# Supplementary material for: Preparation of cubane-1,4-dicarboxylate–Zn–Al layered double hydroxide nanohybrid: comparison of structural and optical properties between experimental and calculated results
Source: Royal Society of Chemistry journal article supplement (doi:10.1039/c5ra09716a), 2015-01-01
Supplement: c5ra09716a1.pdf [file c5ra09716a1.pdf]

Supplementary materials

### Preparation of cubane -1,4-dicarboxylate-Zn-Al-LDH-Nanohybrid: Comparison of Structural-Optical Properties Between Experimental and Calculated Results

Zolfaghar Rezvani\*, Farzad Arjomandi Rad and Fatemeh Khodam

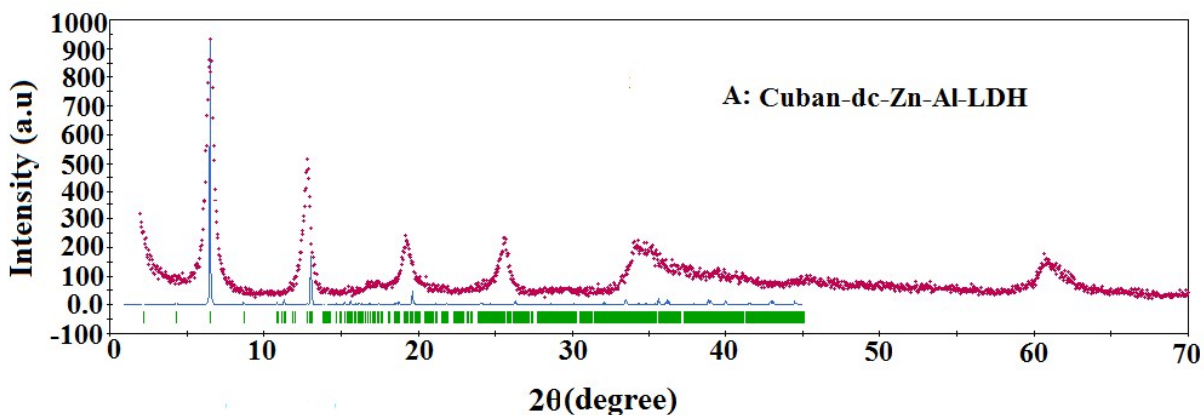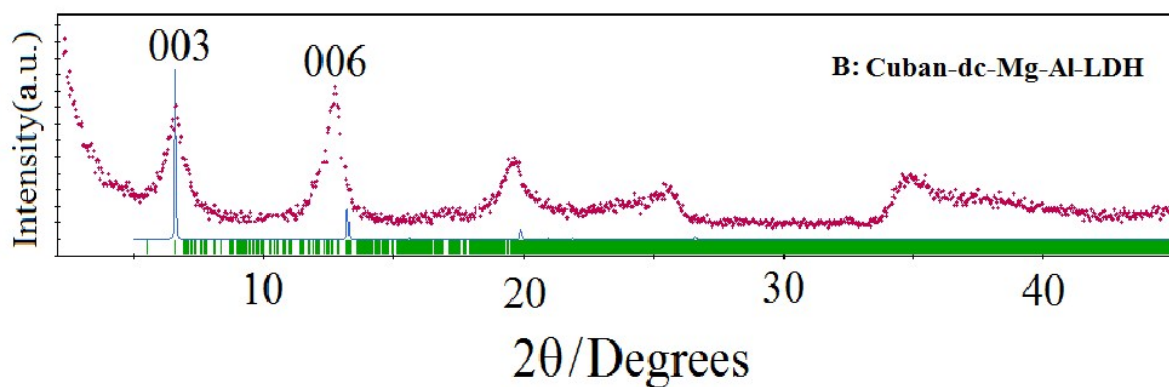

Fig. S1 The calculated (solid line) and experimental (dashed line) x-ray diffraction patterns of A) cubane-dc- Mg-Al-LDH, and B) cubane-dc- Zn-Al-LDH

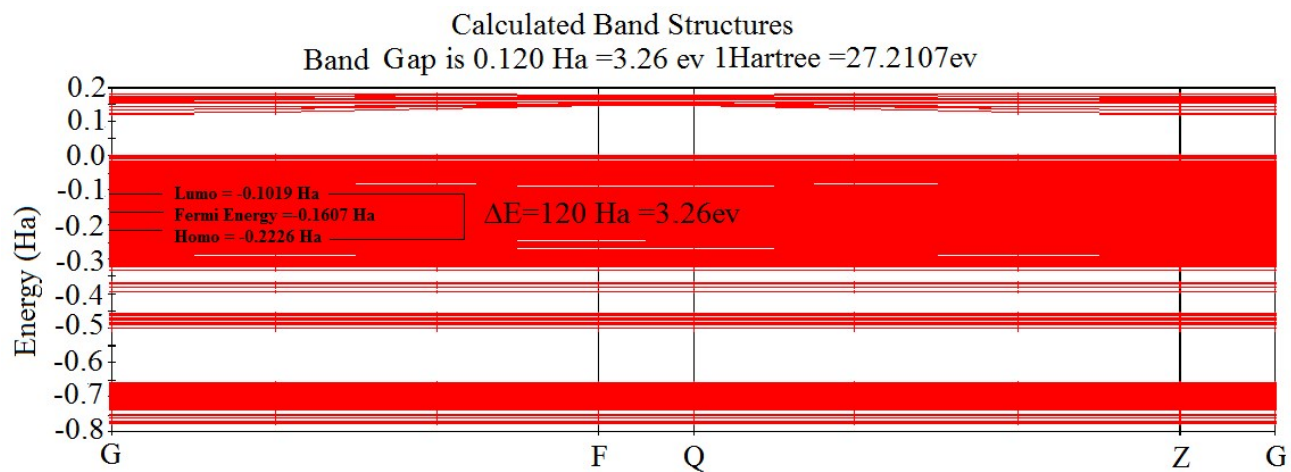

Fig S2. Plot of calculated band structure

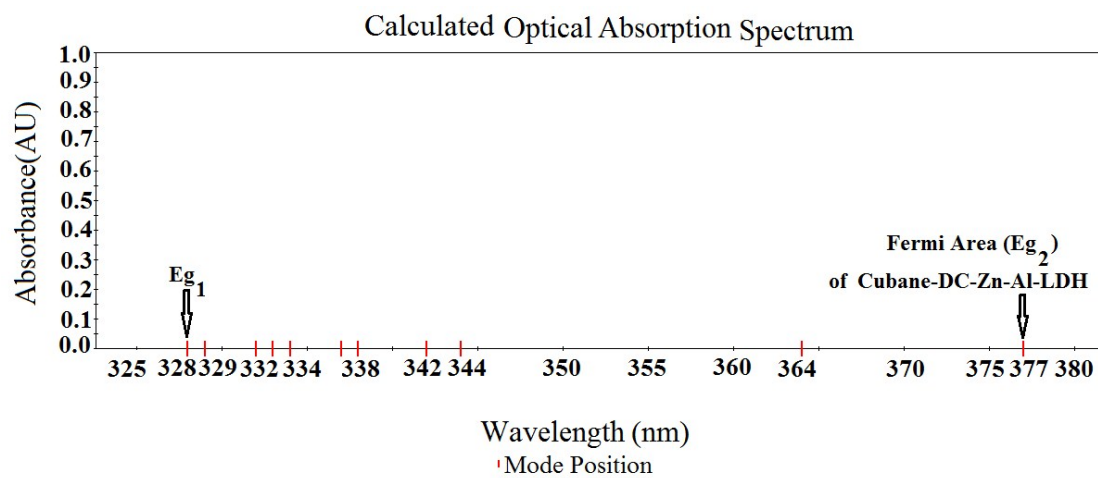

Fig S3. The Calculated Optical Property
